# Supplementary material for: Genome sequence of an aflatoxigenic pathogen of Argentinian peanut, Aspergillus arachidicola
Source: PubMed Central journal article supplement (PMC5845213; doi:10.1186/s12864-018-4576-2), 2018-03-09
Supplement: 12864_2018_4576_MOESM1_ESM.pdf [file 12864_2018_4576_MOESM1_ESM.pdf]

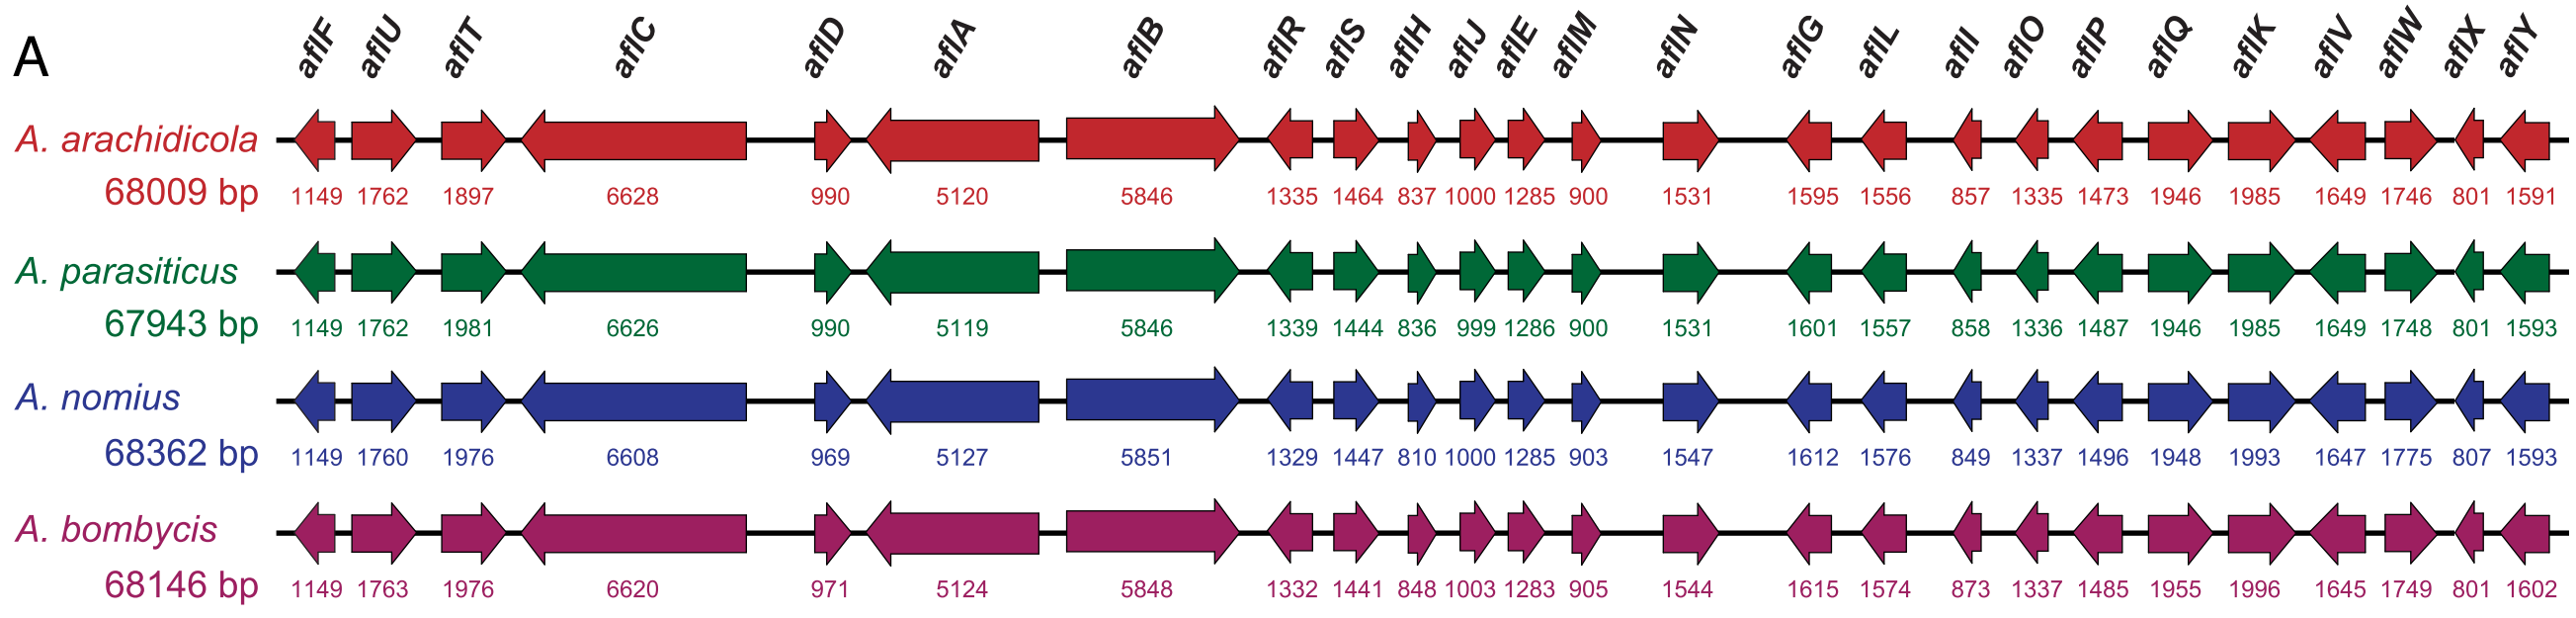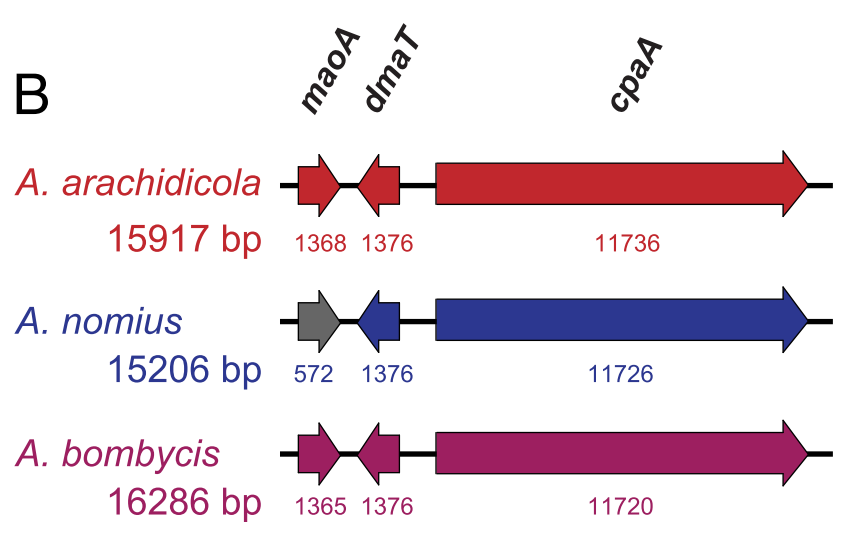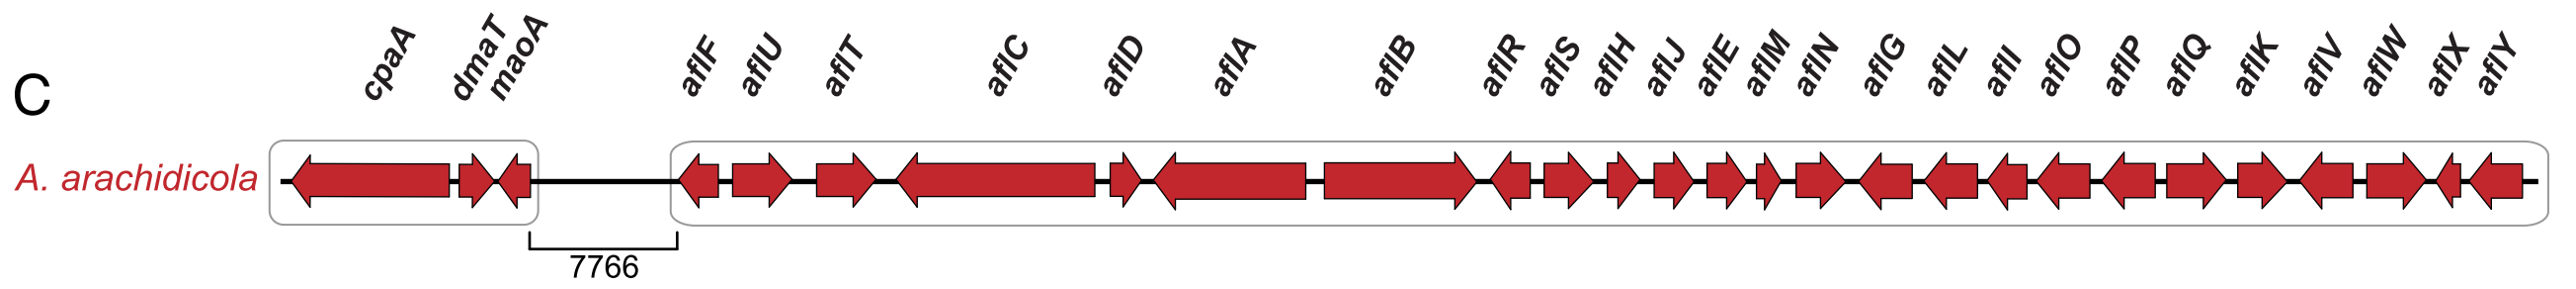

Contig\_10; GenBank accession NEXV01000673
